# Supplementary material for: Pale denizens of the night
Source: Royal Society of Chemistry journal article supplement (doi:10.1039/d1cc07313c), 1994-01-01
Supplement: d1cc07313c1.pdf [file d1cc07313c1.pdf]

Electronic Supplementary Information

**Planar pentacoordinate carbon in a sulphur-surrounded boron  
wheel: The global minimum of  $\text{CB}_5\text{S}_5^+$**

Rui Sun,<sup>a,b</sup> Bo Jin,<sup>a</sup> Bin Huo,<sup>a</sup> Caixia Yuan,<sup>a</sup> Hua-Jin Zhai<sup>\*,b</sup> and Yan-Bo Wu<sup>\*,a</sup>

- a Key Laboratory of Materials for Energy Conversion and Storage of Shanxi Province, Institute of Molecular Science, Shanxi University, 92 Wucheng Road, Taiyuan, Shanxi, 030006, People's Republic of China.
- b Nanocluster Laboratory, Institute of Molecular Science, Shanxi University, 92 Wucheng Road, Taiyuan, Shanxi, 030006, People's Republic of China.

\*To whom correspondence should be addressed.

E-mail: [wyb@sxu.edu.cn](mailto:wyb@sxu.edu.cn) and [hj.zhai@sxu.edu.cn](mailto:hj.zhai@sxu.edu.cn)

**Contents**

|                                                                |   |
|----------------------------------------------------------------|---|
| Computational methods.....                                     | 1 |
| Cartesian Coordinates for the structures shown in Fig. 1. .... | 2 |

## Computational methods

The  $\text{CB}_5\text{S}_5^+$  cluster and its concerned isomers were optimized at both B3LYP/aug-cc-pVTZ and B2PLYP-D3(BJ)/aug-cc-pVTZ levels, which gave almost identical structures and similar vibrational frequencies, so B2PLYP-D3(BJ) results geometries were reported in the text and used for energy improvement at the CCSD(T)/aug-cc-pVTZ level, while the B3LYP functional was used in various electronic structure analyses. The potential energy surface (PES) of  $\text{CB}_5\text{S}_5^+$  was explored using the stochastic search algorithm.<sup>1</sup> Randomly generated initial structures were first optimized at the B3LYP/6-31G(d) level. Then ten lowest isomers were re-optimized and vibrational frequencies analyzed at B2PLYP-D3(BJ)/aug-cc-pVTZ. The energies of six lowest isomers were refined by single-point CCSD(T)/aug-cc-pVTZ calculations. The relative stabilities of isomers were determined by CCSD(T)/aug-cc-pVTZ energies with zero-point energy (ZPE) corrections at B2PLYP-D3(BJ)/aug-cc-pVTZ. Born-Oppenheimer molecular dynamic (BOMD) simulations were carried out to assess dynamic stability at the PBE/DZVP level, using the CP2K package.<sup>2</sup> Vertical detachment energies (VDEs) and vertical electron affinities (VEAs) were calculated using the outer valence Green's function (OVGF) procedure<sup>3</sup> at the OVGF/aug-cc-pVTZ level. Adaptive nature density partitioning (AdNDP)<sup>4</sup> analyses were performed at B3LYP/6-31G(d). Natural bond orbital (NBO)<sup>5</sup> and Nucleus independent chemical shifts (NICS)<sup>6</sup> analyses were performed at B3LYP/aug-cc-pVTZ level. The stochastic search algorithm was realized using the GXYZ 2.0 program,<sup>7</sup> AdNDP analysis was done using the AdNDP program,<sup>8</sup> and cross sections of NICS (CS-NICS) were generated with the Multiwfn 3.8 code.<sup>9</sup> The CCSD(T) calculations were carried out using the MolPro 2012.1 package,<sup>10</sup> NBO analyses were performed using NBO 3.1<sup>11</sup> and all other calculations were performed using the Gaussian 16 package.<sup>12</sup>

### Reference

- 1 (a) M. Saunders, *J. Comput. Chem.*, 2004, **25**, 621-626; (b) P. P. Bera, K. W. Sattelmeyer, M. Saunders, H. F. Schaefer and P. v. R. Schleyer, *J. Phys. Chem. A.*, 2006, **110**, 4287-4290.
- 2 (a) The BOMD simulations were performed at the PBE<sup>2b</sup>/DZVP<sup>2c</sup> level using CP2K package<sup>2d</sup>; (b) J. P. Perdew, K. Burke and M. Ernzerhof, *Phys. Rev. Lett.*, 1996, **77**, 3865–3868; (c) J. VandeVondele and J. Hutter, *J. Chem. Phys.*, 2007, **127**, 114105; (d) T. D. Kühne and J. Hutter, *J. Chem. Phys.*, 2020, **152**, 194103.
- 3 J. V. Ortiz, V. G. Zakrzewski and O. Dolgounircheva, *Conceptual Perspectives in Quantum Chemistry*, Kluwer Academic, 1997.
- 4 D. Y. Zubarev and A. I. Boldyrev, *Phys. Chem. Chem. Phys.*, 2008, **10**, 5207–5217.
- 5 A. E. Reed, L. A. Curtiss and F. Weinhold, *Chem. Rev.*, 1988, **88**, 899-926.
- 6 (a) P. v. R. Schleyer, C. Maerker, A. Dransfeld, H. J. Jiao and N. Hommes, *J. Am. Chem. Soc.*, 1996, **118**, 6317-6318; (b) Z. Chen, C. S. Wannere, C. Corminboeuf, R. Puchta and P. v. R. Schleyer, *Chem. Rev.*, 2005, **105**, 3842-3888.
- 7 (a) Y.-B. Wu, H.-G. Lu, S.-D. Li and Z.-X. Wang, *J. Phys. Chem. A*, 2009, **113**, 3395–3402; (b) H.-G. Lu, Y.-B. Wu, in GXYZ 2.0, Shanxi University, Taiyuan, 2015.
- 8 The AdNDP program was downloaded freely at <http://ion.chem.usu.edu/~boldyrev/adndp.php>.
- 9 T. Lu, F. W. Chen, *J. Comput. Chem.*, 2012, **33**, 580-592.
- 10 H.-J. Werner, *et al.* in MolPro 2012.1, University College Cardiff Consultants Limited, Cardiff U.K., 2012.
- 11 E. D. Glendening, A. E. Reed, J. E. Carpenter and F. Weinhold, NBO Version 3.1., 1990.
- 12 Frisch, M. J., et al. *Gaussian 16 Rev. A.03*, Wallingford, CT, 2016

Cartesian Coordinates for the structures shown in Fig. 1.

B3LYP/aug-cc-pVTZ-optimized structures for structures shown in Fig. 1.

**0**

|   |             |             |             |
|---|-------------|-------------|-------------|
| C | 0.00000000  | 0.00000000  | 0.58333900  |
| B | 0.00000000  | 1.54169200  | 0.09425400  |
| B | 1.46623700  | 0.47640900  | 0.09425400  |
| B | -1.46623700 | 0.47640900  | 0.09425400  |
| B | 0.90618400  | -1.24725500 | 0.09425400  |
| B | -0.90618400 | -1.24725500 | 0.09425400  |
| O | -1.32841700 | 1.82841000  | -0.14640900 |
| O | -2.14942400 | -0.69839000 | -0.14640900 |
| O | 1.32841700  | 1.82841000  | -0.14640900 |
| O | 2.14942400  | -0.69839000 | -0.14640900 |
| O | 0.00000000  | -2.26003900 | -0.14640900 |

**1a**

|   |             |             |            |
|---|-------------|-------------|------------|
| C | 0.00000000  | 0.00000000  | 0.00000000 |
| B | 0.00000000  | 1.64814400  | 0.00000000 |
| B | 1.56747800  | 0.50930500  | 0.00000000 |
| B | -1.56747800 | 0.50930500  | 0.00000000 |
| B | 0.96875500  | -1.33337700 | 0.00000000 |
| B | -0.96875500 | -1.33337700 | 0.00000000 |
| S | -1.66959500 | 2.29800000  | 0.00000000 |
| S | -2.70146100 | -0.87775800 | 0.00000000 |
| S | 1.66959500  | 2.29800000  | 0.00000000 |
| S | 2.70146100  | -0.87775800 | 0.00000000 |
| S | 0.00000000  | -2.84048400 | 0.00000000 |

**1b**

|   |             |             |             |
|---|-------------|-------------|-------------|
| B | -0.05342000 | 0.39896400  | 1.83152200  |
| B | 0.13742800  | -1.20120100 | 1.15211100  |
| B | -0.05342000 | 0.39896400  | -1.83152200 |
| B | 0.13742800  | -1.20120100 | -1.15211100 |
| S | -0.05342000 | -0.96250100 | 2.93621700  |
| S | 0.17733200  | -2.60602500 | 0.00000000  |
| S | -0.09582900 | 2.21003800  | 1.63254700  |
| S | -0.09582900 | 2.21003800  | -1.63254700 |
| S | -0.05342000 | -0.96250100 | -2.93621700 |
| C | 0.04868000  | 1.54950100  | 0.00000000  |
| B | 0.16130100  | 0.10011800  | 0.00000000  |

**1c**

|   |            |             |             |
|---|------------|-------------|-------------|
| C | 0.00000000 | 0.00000000  | 0.16595100  |
| B | 0.00000000 | 1.36453900  | -0.44543100 |
| B | 0.00000000 | 0.00000000  | -2.50646700 |
| B | 0.00000000 | 0.93651600  | 1.49512900  |
| B | 0.00000000 | -1.36453900 | -0.44543100 |
| B | 0.00000000 | -0.93651600 | 1.49512900  |
| S | 0.00000000 | 2.63814100  | 0.85659300  |
| S | 0.00000000 | 0.00000000  | 3.02564100  |
| S | 0.00000000 | 1.69224100  | -2.33692500 |
| S | 0.00000000 | -1.69224100 | -2.33692500 |
| S | 0.00000000 | -2.63814100 | 0.85659300  |

**1d**

|   |             |             |             |
|---|-------------|-------------|-------------|
| C | 0.00000000  | 0.00000000  | 0.36714300  |
| B | 0.00000000  | 1.43427800  | -0.42497500 |
| B | 0.00000000  | 0.00000000  | 1.89649000  |
| B | 0.00000000  | -1.43427800 | -0.42497500 |
| B | -1.43427800 | 0.00000000  | -0.42497500 |
| B | 1.43427800  | 0.00000000  | -0.42497500 |
| S | 0.00000000  | 0.00000000  | 3.49286200  |
| S | 1.72022100  | -1.72022100 | -0.92299400 |
| S | -1.72022100 | 1.72022100  | -0.92299400 |
| S | -1.72022100 | -1.72022100 | -0.92299400 |
| S | 1.72022100  | 1.72022100  | -0.92299400 |

B2PLYP-D3(BJ)/aug-cc-pVTZ-optimized structures for structures shown in Fig. 1.

**0**

|   |             |             |             |
|---|-------------|-------------|-------------|
| C | 0.00000000  | 0.00000000  | 0.59688400  |
| B | 0.00000000  | 1.53996400  | 0.09617100  |
| B | 1.46459300  | 0.47587500  | 0.09617100  |
| B | -1.46459300 | 0.47587500  | 0.09617100  |
| B | 0.90516800  | -1.24585700 | 0.09617100  |
| B | -0.90516800 | -1.24585700 | 0.09617100  |
| O | -1.32873500 | 1.82884700  | -0.14963900 |
| O | -2.14993900 | -0.69855800 | -0.14963900 |
| O | 1.32873500  | 1.82884700  | -0.14963900 |
| O | 2.14993900  | -0.69855800 | -0.14963900 |
| O | 0.00000000  | -2.26058000 | -0.14963900 |

**1a**

|   |             |             |            |
|---|-------------|-------------|------------|
| C | 0.00000000  | 0.00000000  | 0.00000000 |
| B | 0.00000000  | 1.64428700  | 0.00000000 |
| B | 1.56381000  | 0.50811300  | 0.00000000 |
| B | -1.56381000 | 0.50811300  | 0.00000000 |
| B | 0.96648800  | -1.33025600 | 0.00000000 |
| B | -0.96648800 | -1.33025600 | 0.00000000 |
| S | -1.66734700 | 2.29490600  | 0.00000000 |
| S | -2.69782400 | -0.87657600 | 0.00000000 |
| S | 1.66734700  | 2.29490600  | 0.00000000 |
| S | 2.69782400  | -0.87657600 | 0.00000000 |
| S | 0.00000000  | -2.83666000 | 0.00000000 |

**1b**

|   |             |             |             |
|---|-------------|-------------|-------------|
| B | -0.08805800 | 0.40207600  | 1.80630000  |
| B | 0.25776700  | -1.18950000 | 1.13716000  |
| B | -0.08805800 | 0.40207600  | -1.80630000 |
| B | 0.25776700  | -1.18950000 | -1.13716000 |
| S | -0.08805800 | -0.96896800 | 2.90060900  |
| S | 0.36309500  | -2.59874700 | 0.00000000  |
| S | -0.20326200 | 2.20274900  | 1.62771800  |
| S | -0.20326200 | 2.20274900  | -1.62771800 |
| S | -0.08805800 | -0.96896800 | -2.90060900 |
| C | 0.06049100  | 1.56252400  | 0.00000000  |
| B | 0.29053200  | 0.11960600  | 0.00000000  |

**1c**

|   |            |             |             |
|---|------------|-------------|-------------|
| C | 0.00000000 | 0.00000000  | 0.15889400  |
| B | 0.00000000 | 1.36650400  | -0.44879000 |
| B | 0.00000000 | 0.00000000  | -2.47948800 |
| B | 0.00000000 | 0.93590400  | 1.48909400  |
| B | 0.00000000 | -1.36650400 | -0.44879000 |
| B | 0.00000000 | -0.93590400 | 1.48909400  |
| S | 0.00000000 | 2.63613600  | 0.85347800  |
| S | 0.00000000 | 0.00000000  | 3.01785800  |
| S | 0.00000000 | 1.69531900  | -2.32987400 |
| S | 0.00000000 | -1.69531900 | -2.32987400 |
| S | 0.00000000 | -2.63613600 | 0.85347800  |

**1d**

|   |             |             |             |
|---|-------------|-------------|-------------|
| C | 0.00000000  | 0.00000000  | 0.36930500  |
| B | 0.00000000  | 1.42938400  | -0.42315300 |
| B | 0.00000000  | 0.00000000  | 1.89530100  |
| B | 0.00000000  | -1.42938400 | -0.42315300 |
| B | -1.42938400 | 0.00000000  | -0.42315300 |
| B | 1.42938400  | 0.00000000  | -0.42315300 |
| S | 0.00000000  | 0.00000000  | 3.49471700  |
| S | 1.71670100  | -1.71670100 | -0.92413700 |
| S | -1.71670100 | 1.71670100  | -0.92413700 |
| S | -1.71670100 | -1.71670100 | -0.92413700 |
| S | 1.71670100  | 1.71670100  | -0.92413700 |
